# Supplementary material
Source: PubMed Central journal article supplement (PMC4268149)

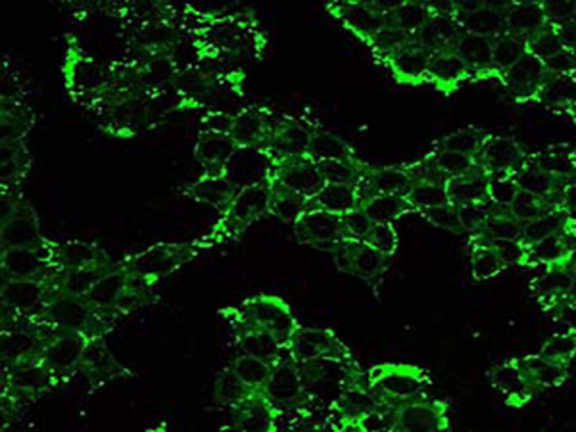

# Caco-2

## - glycanase

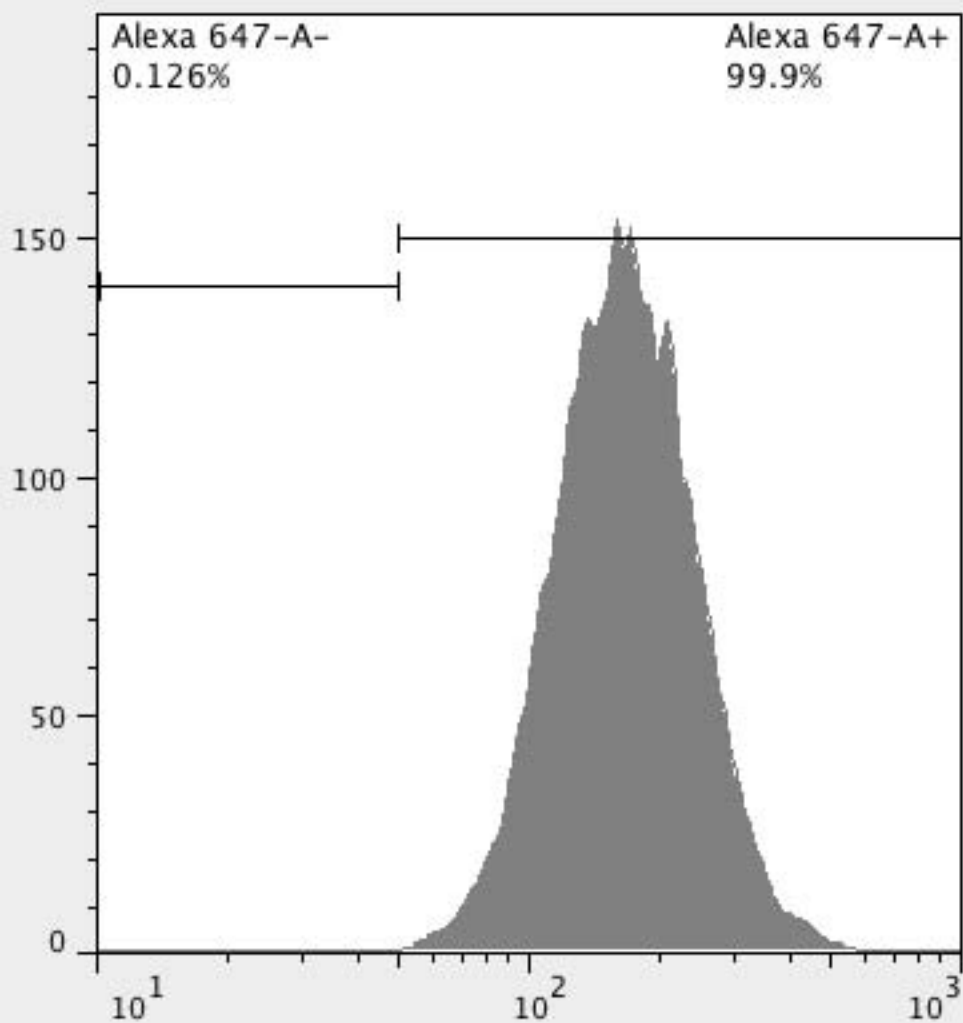

## + glycanase

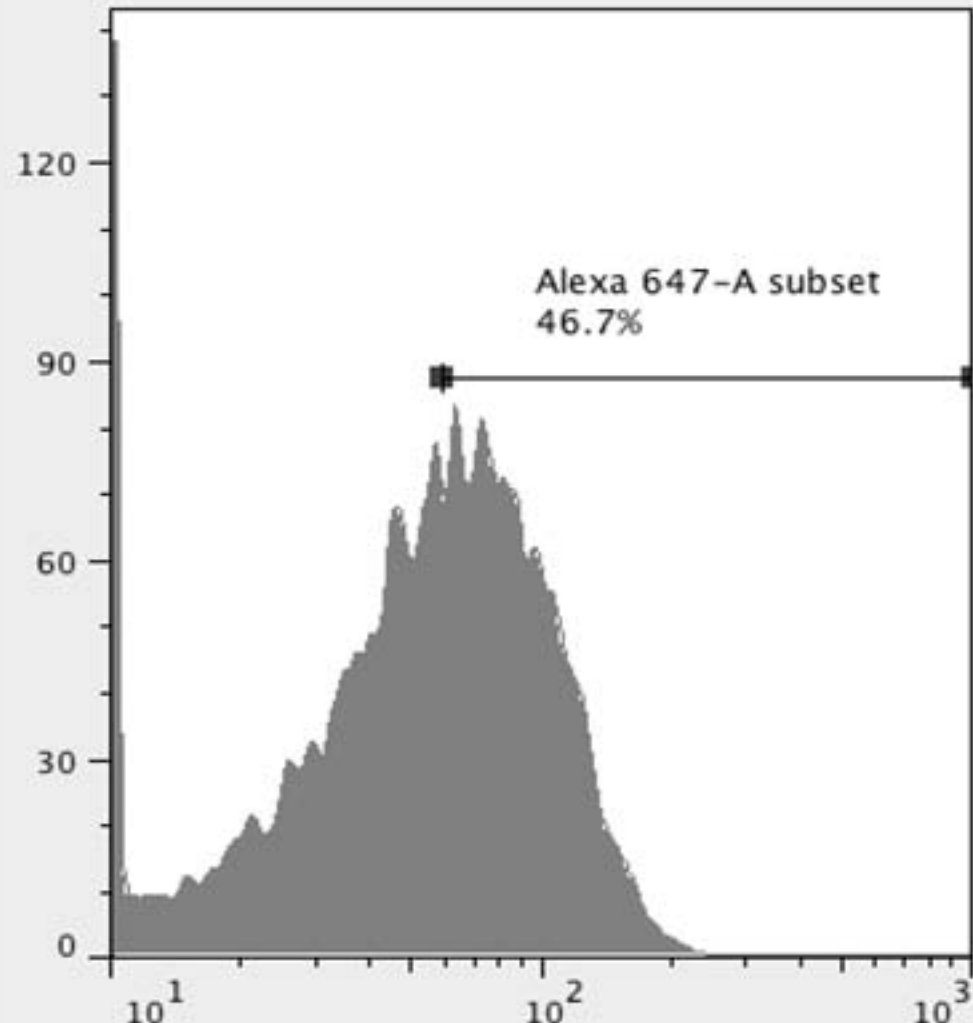

|                                      | Concentration of PNA (mg/mL) |      |      |      |
|--------------------------------------|------------------------------|------|------|------|
| Immobilized PNA ( $\mu\text{g/mL}$ ) | 0.5                          | 1    | 1.5  | 2    |
|                                      | 1.68                         | 2.01 | 2.2  | 3.22 |
|                                      | 1.46                         | 2.26 | 2.48 | 3.59 |
| Average                              | 1.57                         | 2.14 | 2.34 | 3.41 |

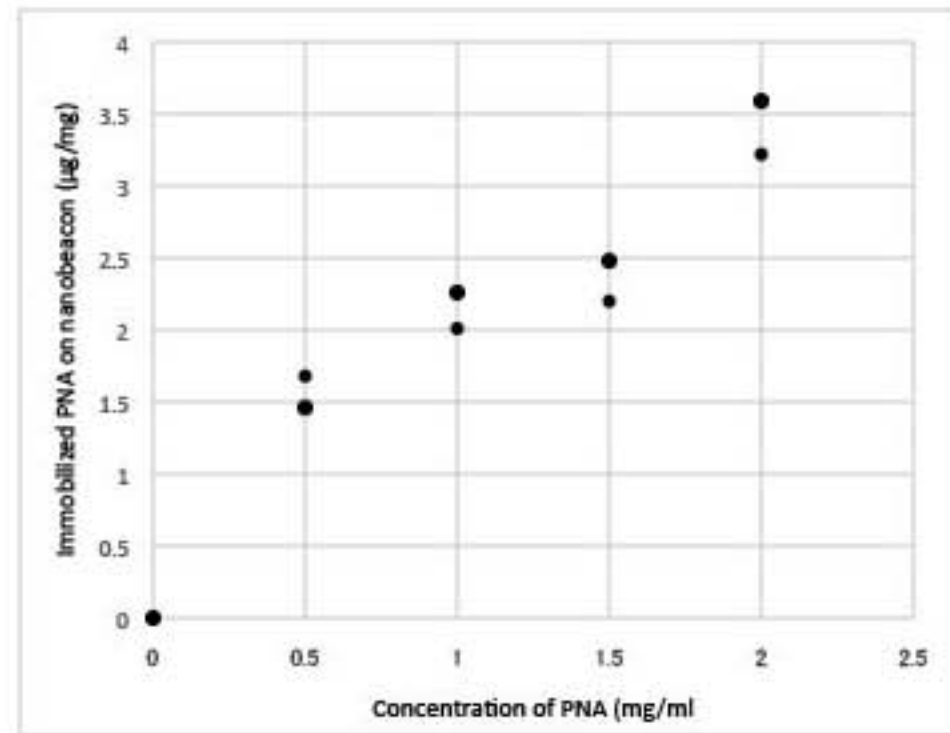

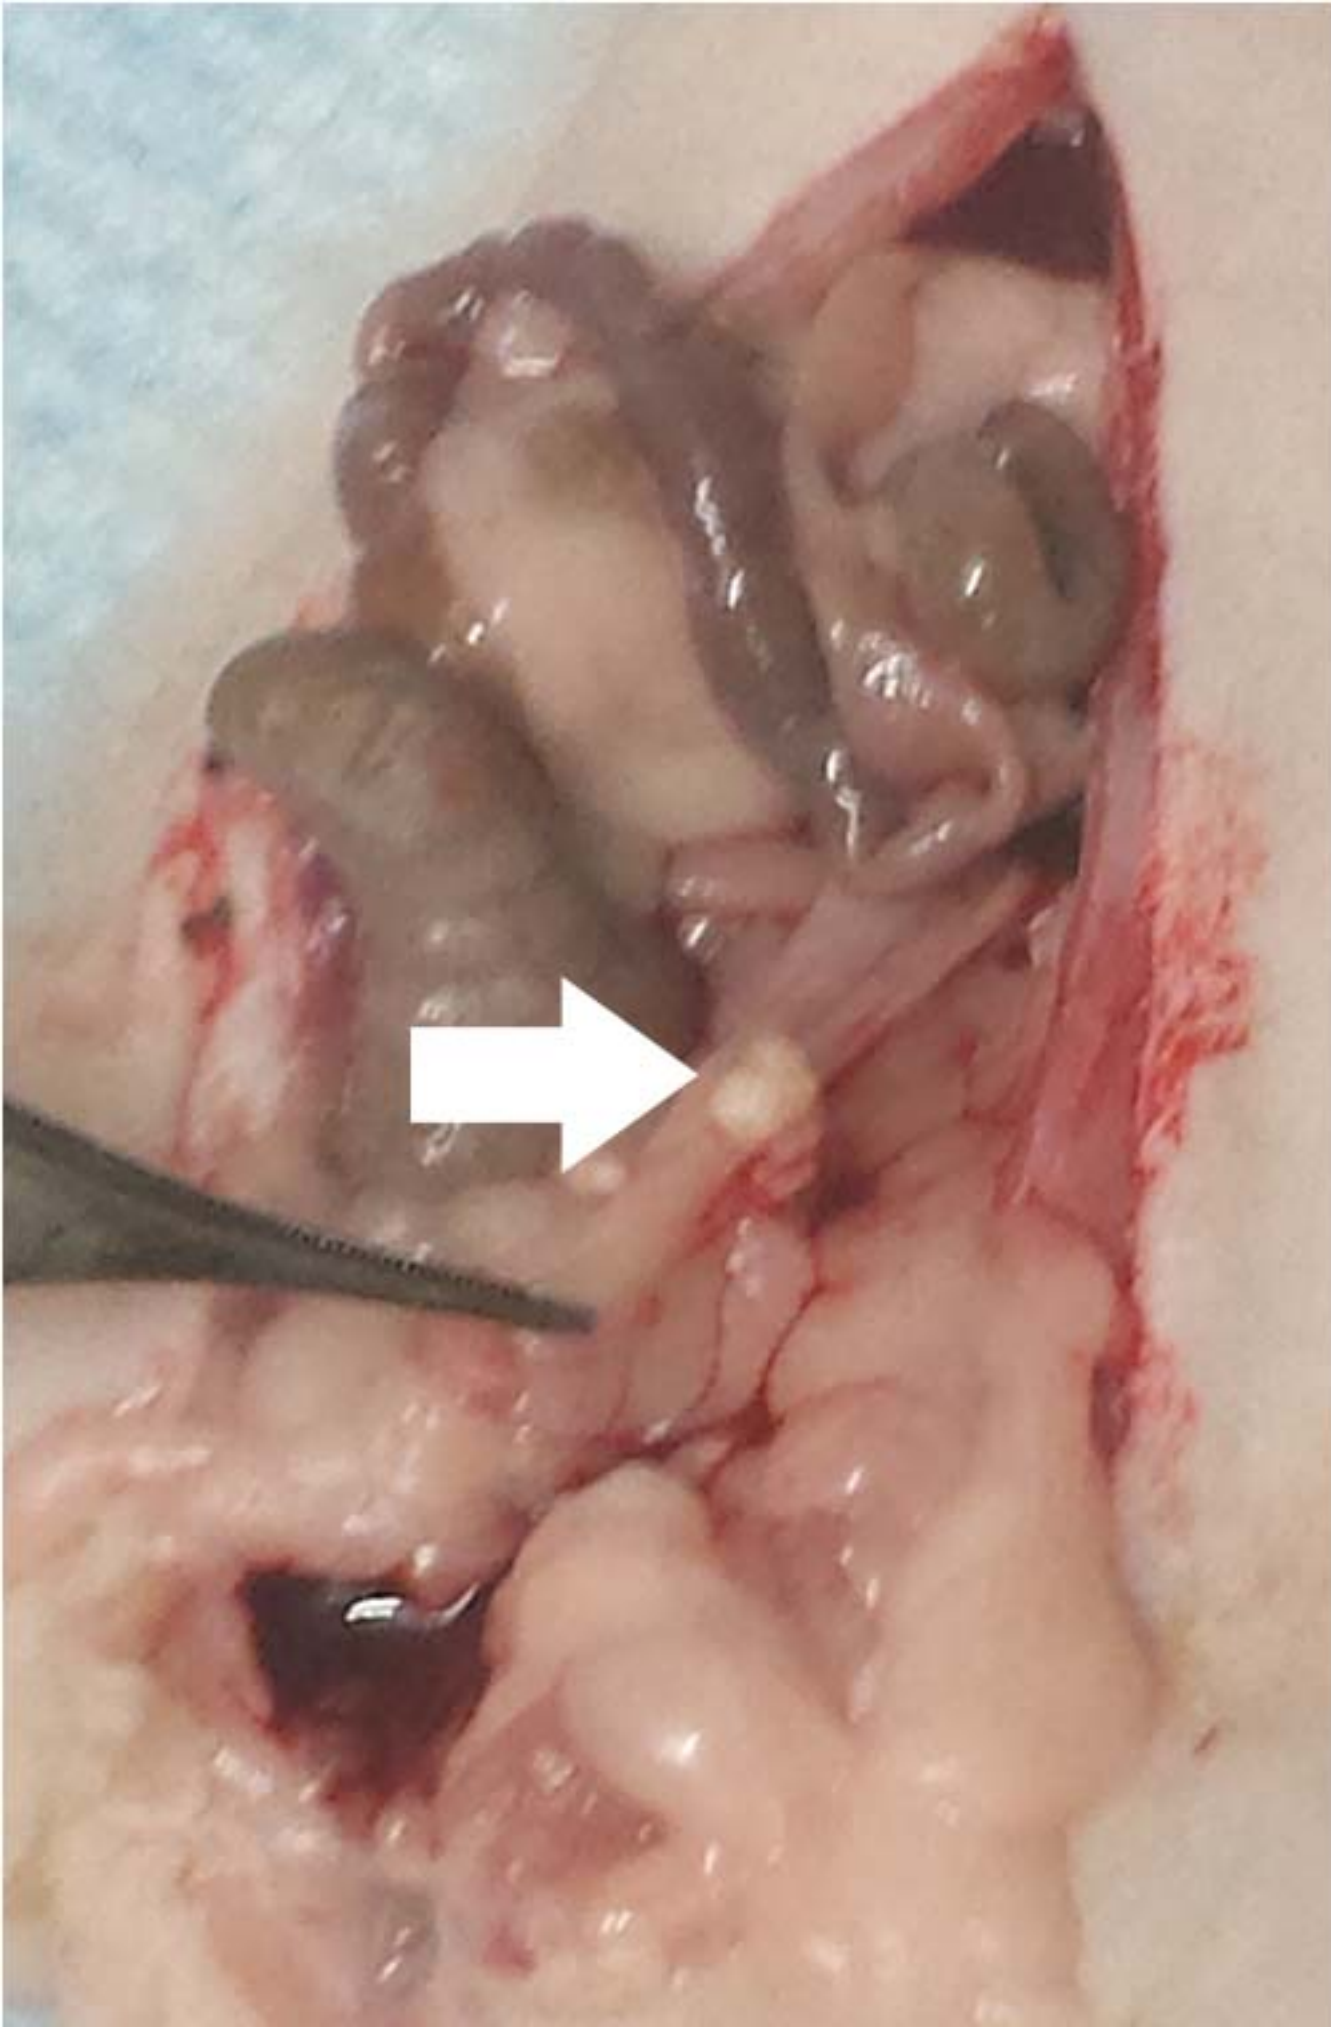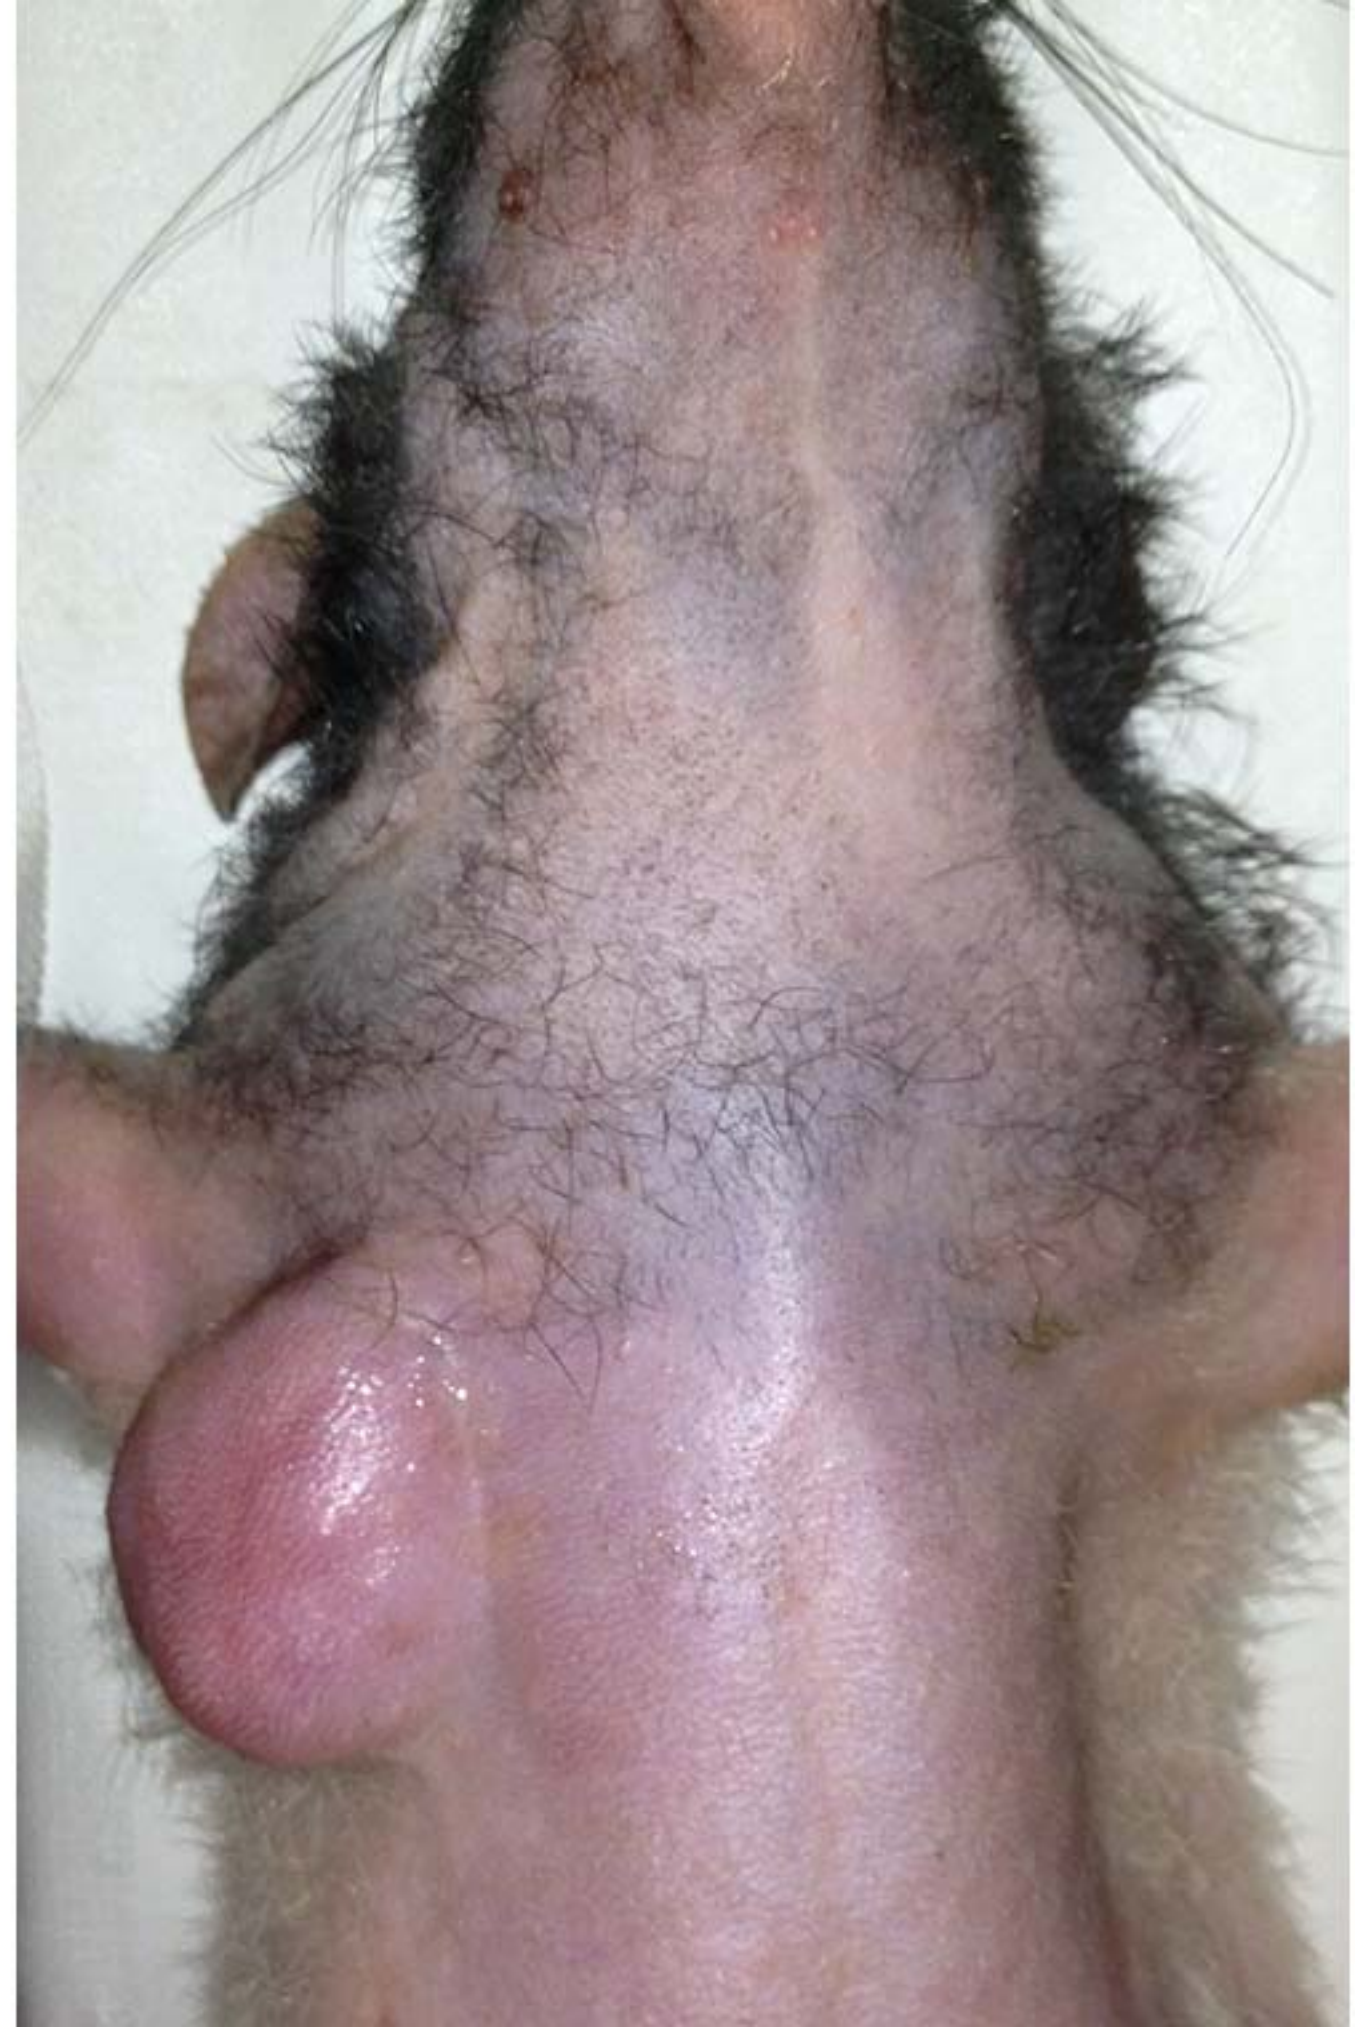

Supplement: NIHMS617824-supplement-Supp_FigureS1-S4.pdf [file NIHMS617824-supplement-Supp_FigureS1-S4.pdf]
